# Supplementary material
Source: Springer Nature journal article supplement (https://www.springermedizin.de/resource/supplementary/12985_2010_851_MOESM2_ESM.pdf/9608588)
Supplement: MOESM2 [file 9608588]

|                       |                     |            |    |
|-----------------------|---------------------|------------|----|
| BrCr:A U22521         | SSKSEYSLVI          | RIYMRMKHVR | 20 |
| 2609AUS74:B1 AF135886 | . . . . K . P . . . | . . . . .  | 20 |
| 7423MS87:B2 U22522    | . . . . K . P . . . | . . . . .  | 20 |
| 2289MAA97:B3 AF135914 | . . . . K . P . . . | . . . . .  | 20 |
| 5511SIN00:B4 DQ341364 | . . . . K . P . . . | . . . . .  | 20 |
| 2896TAI98:B4 AF286516 | . . . . K . P . . . | . . . . .  | 20 |
| 2868TAI98:C2 AF286507 | T . . . K . P . . . | . . . . .  | 20 |
| 2286TX97:C2 AF135941  | T . . . K . P . . . | . . . . .  | 20 |
| 2641AUS95:C2 AF135947 | T . . . K . P . . . | . . . . .  | 20 |
| 4575SIN98:C1 AF376120 | T . . . K . P . . . | . . . . .  | 20 |
| 9718TX89:C1 AF135957  | T . . . K . P . . . | . . . . .  | 20 |
| 9978TX89:C1 AF009558  | T . . . K . P . . . | . . . . .  | 20 |
| KOR01:C3 AY125966     | T . . . K . P . . . | . . . . .  | 20 |
| KOR13:C3 AY125976     | T . . . K . P . . . | . . . . .  | 20 |
| SHZH98:C4 AF302996    | T . . . K . P . . . | . . . . .  | 20 |
| BJ08Z025:C4 FJ606450  | T . . . K . P . . . | . . . . .  | 20 |
| 06282SD:C4 GQ253423   | T . . . K . P . . . | . . . . .  | 20 |
| ZHJC334:C4 GQ487688   | T . . . K . P . . . | . . . . .  | 20 |
| Henan2:C4 GQ994989    | T . . . K . P . . . | . . . . .  | 20 |
